# Supplementary material for: Aldehyde dehydrogenase 2 protects against acute kidney injury by regulating autophagy via the Beclin-1 pathway
Source: PubMed Central journal article supplement (PMC8410052; doi:10.1172/jci.insight.138183), 2021-08-09
Supplement: jciinsight-6-138183-s298.pdf [file jciinsight-6-138183-s298.pdf]

## Supplemental Information

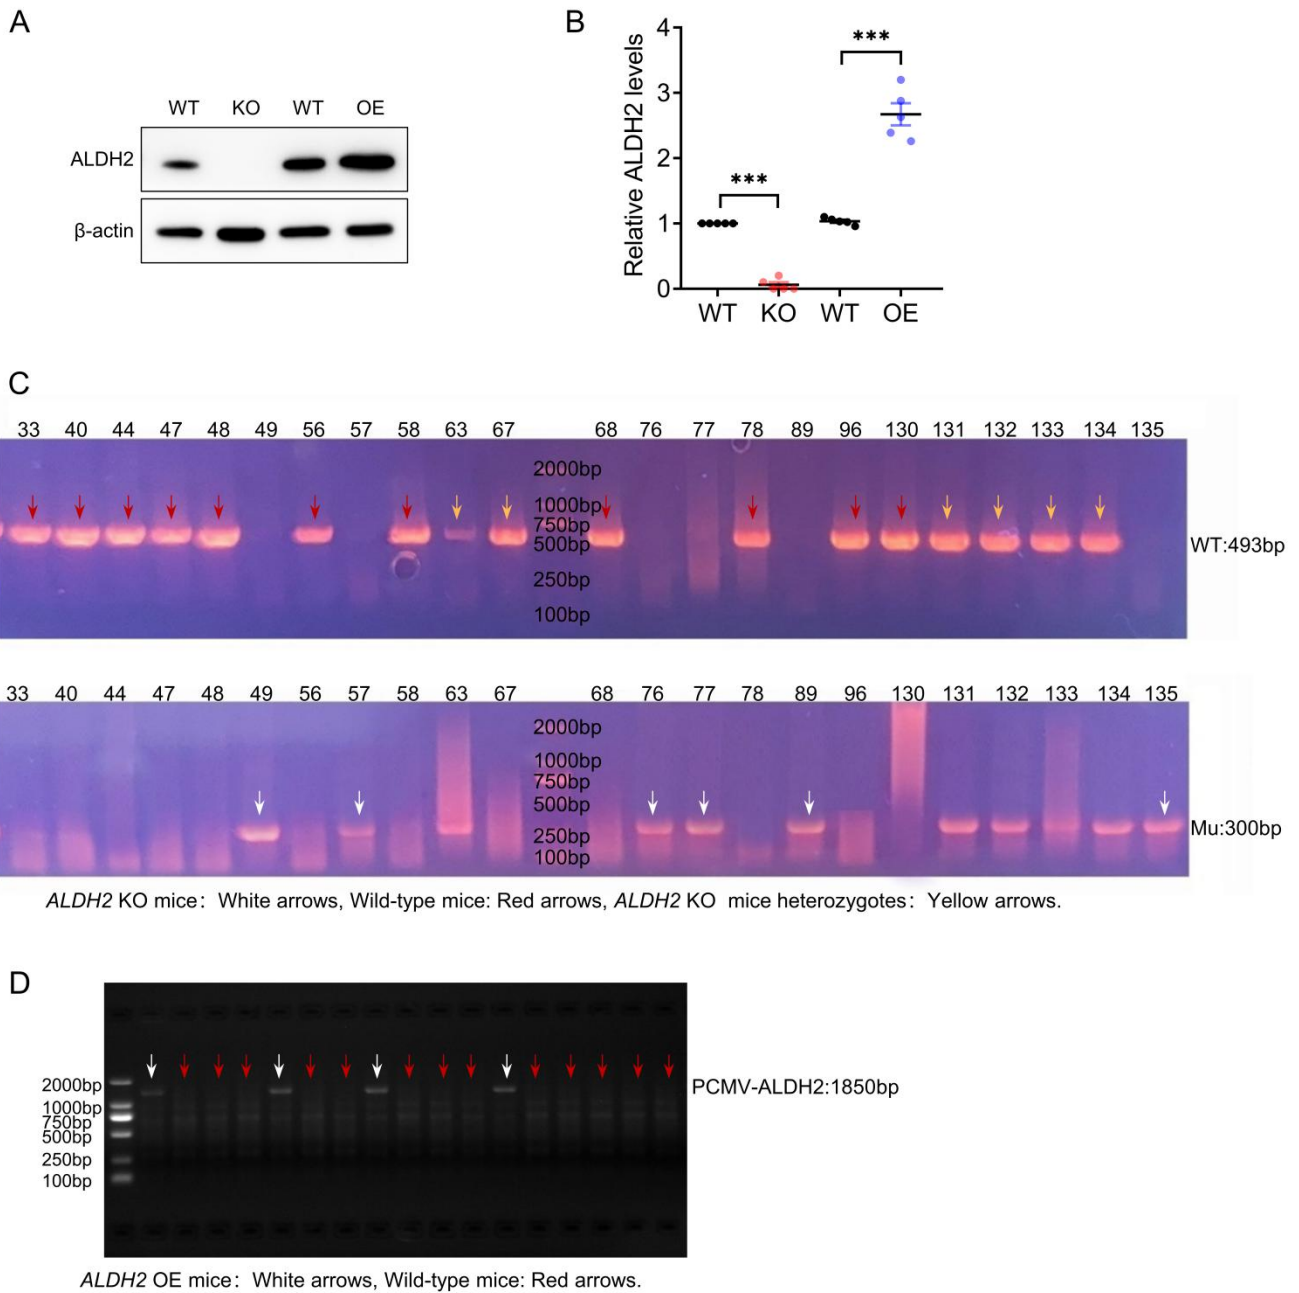

Fig S1. (A and B) Immunoblotting analysis and quantification of ALDH2 in the renal cortex. Data are presented as mean±SEM. Statistical analyses were performed using two-tailed unpaired Student's test. n=5, \*\*\* $P < 0.001$ . (C) Representative images of PCR analyses genotyping the wild-type and *ALDH2* KO mice. The following primers were used for genotyping the wild-type and *ALDH2* KO mice, from chromosomal DNA extracted from a piece of tail. For wild-type, the primer sequences were: forward, 5'-CCGTACTGACTGTCCCATGCAGTGCT-3' and reverse, 5'-GTGACCAGTTACAAAGGGCC-3'.

For *ALDH2* KO, the primer sequences were:

forward, 5'-CCGTACTGACTGTCCCATGCAGTGCT-3' and

reverse, 5'-GGTGGATGTGGAATGTGTGCGAGG-3'.

A PCR product of 300bp indicated *ALDH2* KO (white arrows) while 493bp band indicated wild-type (red arrows).

(D) Representative images of PCR analyses genotyping the wild-type and *ALDH2* OE mice. The following primers were used for genotyping the wild-type and *ALDH2* OE mice, from chromosomal DNA extracted from a piece of tail.

For *ALDH2* OE, the primer sequences were:

forward, 5'-GCGTGTACGGTGGGAGGTCTAT-3' and

reverse, 5'-GGCTGGCAACTAGAAGGCACAG-3'.

A PCR product of 1850bp indicated *ALDH2* OE (white arrows) while no band indicated wild-type (red arrows).

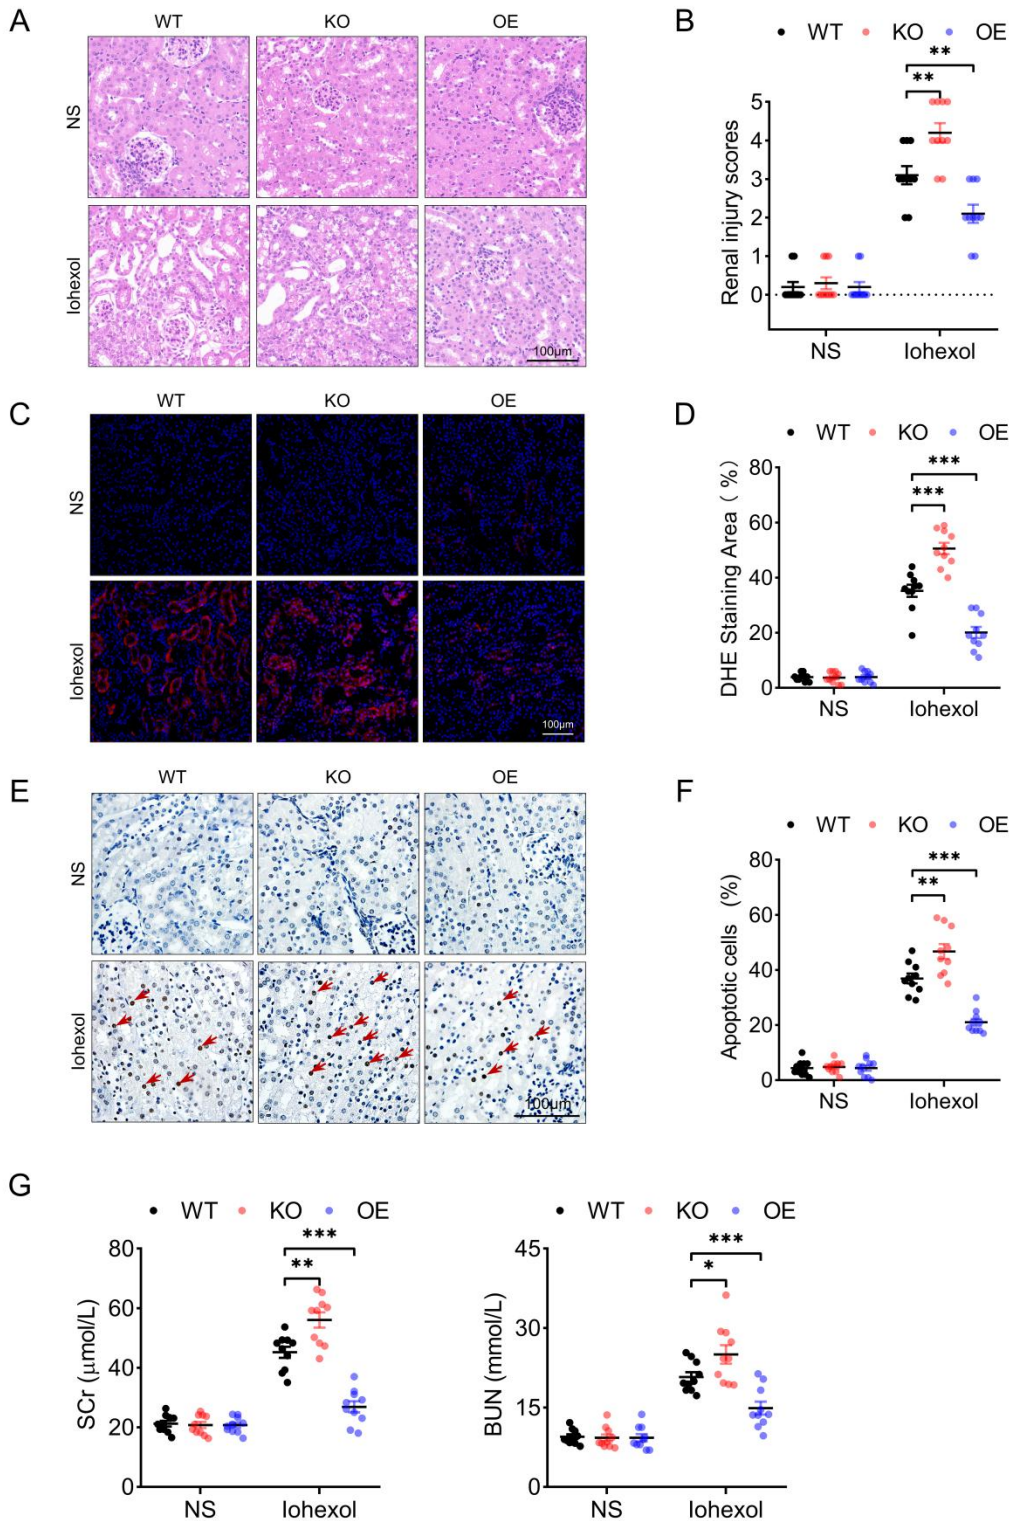

Fig S2. (A and B) Representative images and quantification of HE staining in the renal cortex. (C and D) Representative images and quantification of DHE staining (red) in the renal cortex. Scale bar: 100µm. (E and F) Representative images and quantification of TUNEL staining in the renal cortex. TUNEL positive cells are indicated by red arrows. Scale bar: 100µm. (G) Renal function was

evaluated by SCr (serum creatinine) and BUN (blood urea nitrogen). Data are presented as mean±SEM. Statistical analyses were performed using Chi square test (B) or 1-way ANOVA with a post hoc test (D, F and G). n=10. \* $P < 0.05$ , \*\* $P < 0.01$ , \*\*\* $P < 0.001$ .

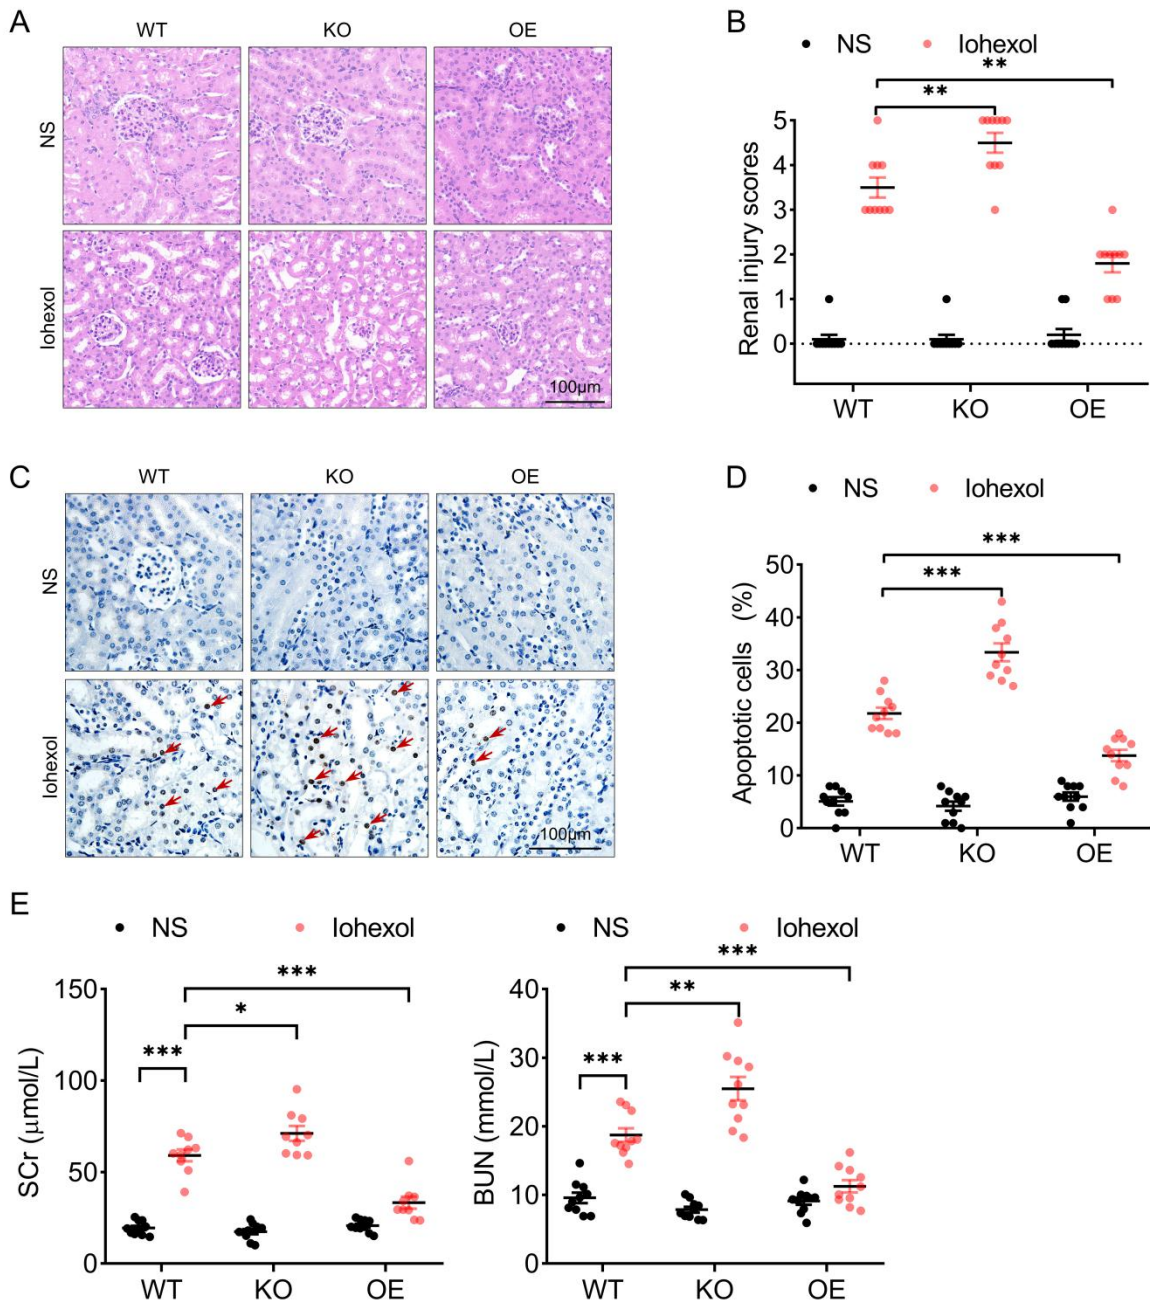

Fig S3. (A and B) Representative images and quantification of HE staining in the renal cortex. (C and D) Representative images and quantification of TUNEL staining in the renal cortex. TUNEL positive cells are indicated by red arrows. Scale bar: 100µm. (E) Renal function was evaluated by SCr (serum creatinine) and BUN (blood urea nitrogen). Data are presented as mean±SEM. Statistical analyses were performed using Chi square test (B) or 1-way ANOVA with a post hoc test (D and E). n=10. \* $P < 0.05$ , \*\* $P < 0.01$ , \*\*\* $P < 0.001$ .

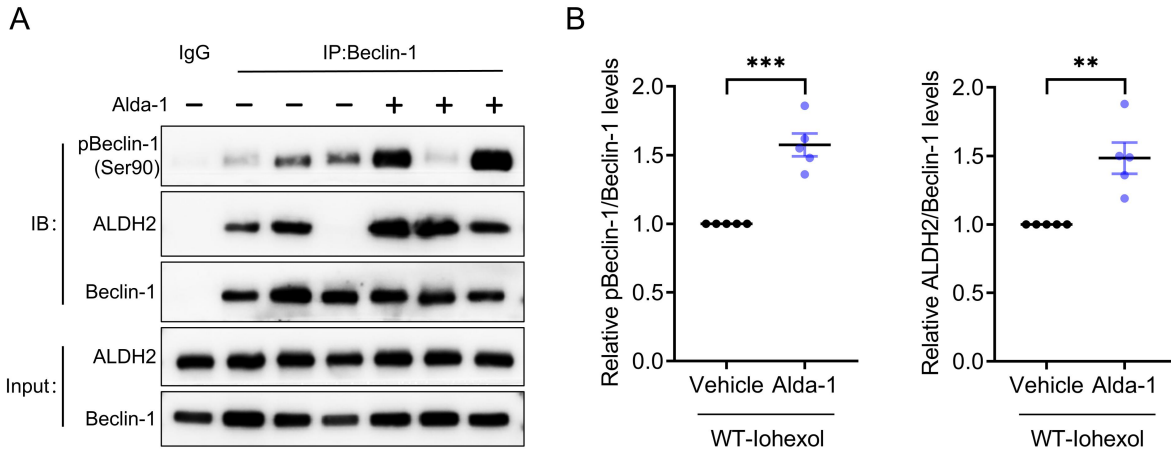

Fig S4. (A and B) Immunoprecipitation analysis and quantification of the physical interaction between pBeclin-1(Ser90), ALDH2 and Beclin-1 proteins in RTECs. Lysates were extracted for immunoprecipitation with Beclin-1-specific antibody or control IgG, followed by probing with antibodies specific for pBeclin-1(Ser90) and ALDH2. Data are presented as mean±SEM. Statistical analyses were performed using two-tailed unpaired Student's test. n=5. \* $P < 0.05$ , \*\* $P < 0.01$ , \*\*\* $P < 0.001$ .

Table 1. List of differentially expressed genes in renal cortex from WT CI-AKI mice pretreated vs. not pretreated with Alda-1.

| Gene Symbol | Log2FoldChange |
|-------------|----------------|
| Atg5        | 1.254037129    |
| Becn1       | 1.085983873    |
| Atg12       | 1.069530325    |
| Atg10       | 1.349976513    |
| Ulk1        | 1.022926397    |
| Abca13      | 1.160435279    |
| Hmgcll1     | 1.162848105    |
| Zfp790      | 1.329674583    |
| Unkl        | 1.17717326     |
| Lonrf3      | 1.202526604    |
| Ffar3       | 1.551812648    |
| Lin7a       | 1.224497539    |
| Hsp90aa1    | 1.040904946    |
| Atp12a      | 3.088445643    |
| Epb42       | 1.156824227    |
| Sectm1a     | 1.318325383    |
| Hspa5       | 1.015695427    |
| Tchhl1      | 1.282858747    |
| Calb1       | 1.219814185    |
| Dnaja1      | 1.018315736    |
| Kbtbd8      | 1.348764687    |
| Tmem52b     | 1.138670811    |
| Kctd7       | 1.035089925    |
| Mfrp        | 1.55195538     |
| Slc16a9     | 1.085066461    |
| Camk4       | 1.067413722    |
| Rnf146      | 1.129982525    |
| Sectm1b     | 1.01520009     |
| Chd3os      | 1.45724597     |
| Adra1a      | 1.484298594    |
| Hist1h2be   | 1.358180436    |
| Vstm2a      | 1.372743784    |
| Ppp1r3d     | 1.08367149     |
| Zfp11       | 1.16155957     |
| Casr        | 1.038438143    |
| Hbb-bs      | 1.496066926    |
| Lipg        | 2.06546018     |
| Slc8a1      | 1.538368866    |
| Ncoa4       | 1.067159138    |
| Tmem178b    | 1.390674014    |



|           |              |
|-----------|--------------|
| Anks1b    | 1.437147313  |
| Slc10a5   | 1.335363296  |
| Klk1b9    | 1.115662313  |
| Klk1b27   | 1.482036453  |
| Cyp26b1   | 1.54764975   |
| Zbtb16    | 1.977254743  |
| Olfra461  | 1.885880503  |
| Fv1       | 1.392069364  |
| Tmppe     | 1.10428149   |
| Hist2h3c2 | 1.803258596  |
| Nat8f7    | 1.174465109  |
| Zfp882    | 1.169763499  |
| Fap       | -1.825885902 |
| Grasp     | -1.298875768 |
| Sult5a1   | -1.809632128 |
| Fkbp10    | -1.036489408 |
| Tcirg1    | -1.025715402 |
| Vsig2     | -1.109324524 |
| Srpk3     | -1.561487227 |
| Ltbp2     | -2.667399518 |
| Rec8      | -1.241939578 |
| Akap8l    | -1.464340942 |
| Hdgfl2    | -1.036543743 |
| Arrdc2    | -1.234269394 |
| Sult2b1   | -2.61375313  |
| Bax       | -1.107093001 |
| Col5a3    | -1.743050522 |
| Cacna1e   | -1.93035737  |
| Atn1      | -1.577035152 |
| Etfb      | -1.863060023 |
| Dnah2     | -1.527437363 |
| Fam131c   | -1.433395577 |
| Epor      | -1.191075114 |
| Slc4a3    | -1.328847763 |
| Zfp184    | -1.093938962 |
| Atp1a2    | -1.040071899 |
| Tssk4     | -1.594024438 |
| Cpt1c     | -1.369340732 |
| Pou2f2    | -1.14535695  |
| Dqx1      | -1.094495064 |
| Nav1      | -1.06778796  |
| Brf1      | -1.015612206 |
| Fuz       | -1.299587899 |



|          |              |
|----------|--------------|
| Enkd1    | -1.500205407 |
| Clip3    | -1.061891977 |
| Hoxa2    | -1.638000413 |
| Slc9a5   | -1.223360747 |
| Aldh1a3  | -1.772804774 |
| Cyp2j9   | -1.86737357  |
| Gzmb     | -1.21147218  |
| Ager     | -1.672204562 |
| Anxa9    | -1.467701366 |
| Dhx58    | -1.018112028 |
| Mybl2    | -1.831750737 |
| Pcgf2    | -1.210074706 |
| Ybx2     | -1.449166894 |
| Dnah11   | -1.325636957 |
| Chtf18   | -1.541739767 |
| Ptger1   | -2.251470106 |
| Arhgef25 | -1.208255345 |
| Socs2    | -1.464152545 |
| Pcsk4    | -1.488915525 |
| Rab36    | -1.107519088 |
| Coro6    | -2.048957681 |
| Lrrc46   | -1.417362763 |
| Per1     | -1.480139717 |
| Pole2    | -1.013588275 |
| Tfap2a   | -1.064873695 |
| Gadd45g  | -1.505268192 |
| Fam193b  | -1.477291476 |
| Tert     | -1.116385009 |
| Mss51    | -1.641351695 |
| Bmp1     | -1.204324265 |
| Dok2     | -1.21875599  |
| Dscc1    | -1.940740908 |
| Apod     | -1.487777661 |
| Adck5    | -1.057027118 |
| Lypd2    | -1.503175991 |
| Mapk12   | -1.332162529 |
| Chkb     | -1.403822028 |
| Hira     | -1.082188772 |
| Prpf40b  | -1.340435704 |
| Aqp2     | -1.005706803 |
| Npff     | -2.53982141  |
| Cldn6    | -1.648653649 |
| Pkmyt1   | -1.615402683 |

|          |              |
|----------|--------------|
| Satb1    | -1.000808315 |
| E4f1     | -1.031744065 |
| Rgs11    | -1.858928769 |
| Map3k8   | -1.38078075  |
| Adamts10 | -1.213817007 |
| Gabbr1   | -1.593837844 |
| Slc4a9   | -1.256887129 |
| Rps6kb2  | -1.232184787 |
| Ctsw     | -1.499938059 |
| Hells    | -1.397015016 |
| Lrrc45   | -1.252188696 |
| Pfkfb1   | -1.06865089  |
| Gli1     | -1.933930405 |
| Mbd6     | -1.056830538 |
| Agap2    | -1.41275089  |
| Adam8    | -1.381046868 |
| Irf7     | -1.052906831 |
| Lmntd2   | -1.44275621  |
| Pidd1    | -1.170037329 |
| Col7a1   | -1.581424825 |
| Asnsd1   | -1.380775675 |
| Pkn3     | -1.273055347 |
| Dnm1     | -1.31632035  |
| Nr4a2    | -1.434443418 |
| Card9    | -1.192405132 |
| Gpsm1    | -1.323490525 |
| Syt13    | -1.138593196 |
| Hdc      | -2.155541361 |
| Mall     | -1.457465107 |
| Ccm2l    | -1.398435279 |
| S100a11  | -1.099967016 |
| Efna4    | -1.543823637 |
| Celf3    | -2.372879313 |
| Gem      | -1.205937407 |
| Ambp     | -1.767452962 |
| Npr2     | -1.022937503 |
| Mfsd2a   | -1.672859539 |
| Mutyh    | -1.204084289 |
| Ccdc163  | -1.087923874 |
| Miip     | -1.158735908 |
| Tnfrsf4  | -2.580082234 |
| Cenpa    | -1.26269982  |
| Nsun7    | -1.692644086 |

|          |              |
|----------|--------------|
| Uchl1    | -1.413944447 |
| Slc10a6  | -2.369554311 |
| Cabp1    | -1.405725769 |
| Rasal1   | -2.642186344 |
| Tmem213  | -1.331942125 |
| Nfe2l3   | -1.120637852 |
| Grip2    | -1.260291957 |
| Lrmp     | -1.020737005 |
| Ing4     | -1.710746136 |
| Tgfb1i1  | -1.242509679 |
| Itgam    | -1.966280955 |
| Cd37     | -1.236949675 |
| Dnhd1    | -1.087966191 |
| Praf2    | -1.305456353 |
| Gabre    | -1.539403435 |
| Plp1     | -1.04314245  |
| Plip     | -1.440993993 |
| Chek1    | -1.211791439 |
| Robo3    | -1.177680455 |
| Pde4a    | -1.006776912 |
| Dock6    | -1.230501215 |
| Kif23    | -1.143851182 |
| Csrnp1   | -1.134453434 |
| Cish     | -1.407762231 |
| Klhdc8b  | -1.354271325 |
| Oas2     | -1.538864679 |
| Mdfi     | -1.30676517  |
| Abcc10   | -1.006748654 |
| Rnft2    | -1.040705841 |
| Inha     | -1.855291478 |
| Znrf1    | -1.175562033 |
| Tspoap1  | -1.187734141 |
| Ly6d     | -1.827243211 |
| Cacna1a  | -1.223644496 |
| Tle2     | -1.532095729 |
| Cpne7    | -1.335760556 |
| Ncaph    | -1.670003372 |
| Ushbp1   | -1.055556884 |
| Igsf6    | -1.043919556 |
| Ssc5d    | -2.006086155 |
| Caps2    | -1.593222794 |
| Arhgap45 | -1.339968394 |
| Usp35    | -1.439631331 |

|               |              |
|---------------|--------------|
| H2-Q4         | -1.388408468 |
| Zfp57         | -1.638419029 |
| Phf24         | -1.650615113 |
| Slc2a6        | -1.413141919 |
| Fxyd1         | -1.24435299  |
| Zfp692        | -1.598633625 |
| Aldh3b3       | -1.327978029 |
| Mfsd2b        | -1.26483761  |
| Cep85         | -1.366176482 |
| Plekhg2       | -1.308671876 |
| Wdhd1         | -1.09424353  |
| Kcnk2         | -1.348718928 |
| Hoxb5         | -1.070460478 |
| A230050P20Rik | -1.74487139  |
| Irs2          | -1.018578053 |
| Zfp653        | -1.502593059 |
| Nexn          | -1.225517596 |
| Isg20         | -1.208092551 |
| Dusp10        | -1.290042677 |
| Neil3         | -1.75857586  |
| Ncam1         | -1.177219596 |
| Timeless      | -1.034433124 |
| Plcb2         | -1.026269445 |
| Arntl2        | -1.104390142 |
| Tbc1d10c      | -1.543169903 |
| Cchcr1        | -1.10650829  |
| Dtx3          | -1.151257675 |
| Hipk4         | -1.774443512 |
| Xaf1          | -1.279078861 |
| Plppr2        | -1.813505784 |
| Cd79b         | -1.458023364 |
| Col16a1       | -1.019822786 |
| Myh6          | -2.19319365  |
| Arhgef1       | -1.113721015 |
| Tspyl2        | -1.055435252 |
| Rgl2          | -1.018320889 |
| Meis3         | -1.655591669 |
| Serpina3g     | -1.698321434 |
| H2-Ob         | -1.136045074 |
| Lrrc29        | -1.059617837 |
| Mapk1ip1      | -1.359797537 |
| Mcm3          | -1.116369198 |
| Nfkbil1       | -1.317570066 |

|               |              |
|---------------|--------------|
| Ypel3         | -1.073842881 |
| Olf78         | -1.827795206 |
| Fam25c        | -1.423819555 |
| Als2cl        | -1.013908757 |
| Ii20rb        | -2.303732639 |
| Tceal3        | -1.08570211  |
| Tex38         | -2.98328     |
| Lrrc3b        | -1.417075049 |
| Penk          | -1.381583264 |
| Scand1        | -1.495680672 |
| Ankle1        | -1.823440635 |
| Mroh7         | -1.268379218 |
| Palm3         | -1.014643867 |
| Tmem81        | -1.200188171 |
| Cracr2b       | -1.31679872  |
| Ccdc57        | -1.217351164 |
| Nrap          | -1.105420989 |
| Tmem200a      | -2.899345421 |
| Grem2         | -3.030951008 |
| Grrp1         | -1.016161743 |
| Tmc8          | -1.478415536 |
| Eva1b         | -1.277994014 |
| Carmil2       | -1.68618158  |
| Zfp579        | -1.740152799 |
| Kcnf1         | -1.060749886 |
| Kctd14        | -1.541379279 |
| Nlgn2         | -1.422682026 |
| Serp2         | -1.628322793 |
| A630001G21Rik | -1.499149718 |
| Mapk11        | -1.334343003 |
| Fes           | -1.079963029 |
| Ebf4          | -1.710042381 |
| Lgals4        | -1.428957118 |
| Ankrd24       | -1.147332937 |
| Tmem158       | -1.605920744 |
| Zfp580        | -1.098549306 |
| Izumo4        | -1.264285718 |
| Fam19a3       | -1.878669977 |
| Tmem150a      | -1.062724529 |
| Csf2ra        | -1.156992717 |
| Tcea2         | -1.045321899 |
| Nrm           | -1.35004934  |
| Arrb2         | -1.019558837 |

|           |              |
|-----------|--------------|
| Mfap2     | -1.358740033 |
| Ifitm2    | -1.107073141 |
| Eno3      | -1.286836565 |
| Clasrp    | -1.151305034 |
| Ccdc62    | -1.617904382 |
| Serpina10 | -1.764883771 |
| Lmtk3     | -3.412176165 |
| Tubb4a    | -1.31548817  |
| Rpl35     | -1.09560297  |
| Egfem1    | -2.661695006 |
| Slc22a21  | -1.107531455 |
| Mapk15    | -1.575152457 |
| mt-Nd6    | -1.080778022 |
| Fbxl12    | -1.042659137 |
| Mas1      | -1.178487721 |
| Il3ra     | -1.803693042 |
| Tmem100   | -1.642151635 |
| Naip5     | -1.19683818  |
| Csf2rb2   | -1.149448931 |
| Eme2      | -1.088567673 |
| Ecscr     | -1.072675385 |
| Rpl27-ps3 | -1.611868748 |
| Sh3d21    | -1.11409455  |
| Bglap3    | -1.497842789 |
| Ripor3    | -1.182650723 |
| Sptbn5    | -1.435645445 |
| Hoxc4     | -1.447106729 |
| Nrbp2     | -1.674675673 |
| Rad54b    | -1.818096208 |
| Prkcg     | -1.987741341 |
| Insl3     | -1.265547945 |
| Kcnip3    | -1.430631711 |
| Hoxd3     | -1.520870979 |
| Phyhd1    | -1.307631809 |
| Tmsb10    | -1.154871    |
| Stard6    | -1.889127516 |
| Rnf8      | -1.341726217 |
| Itga10    | -1.55876101  |
| Churc1    | -1.718123567 |
| Prr22     | -2.610973129 |
| Col6a5    | -1.408580385 |
| Gm20518   | -1.726100063 |
| Higd1c    | -1.447022529 |

|         |              |
|---------|--------------|
| Tnfsf12 | -1.326280858 |
| Xndc1   | -1.090155466 |
| Gtf3c2  | -1.025632578 |
| Flt3l   | -1.57867425  |
| Lilr4b  | -1.178866943 |
